# Supplementary material for: Influence of Sociodemographic, Premorbid, and Injury-Related Factors on Post-Concussion Symptoms after Traumatic Brain Injury
Source: MDPI journal article supplement (doi:10.3390/jcm9061931), 2020-06-19
Supplement: s1 [file s1]

**The CENTER-TBI participants and investigators:**

Cecilia Åkerlund<sup>1</sup>, Krisztina Amrein<sup>2</sup>, Nada Andelic<sup>3</sup>, Lasse Andreassen<sup>4</sup>, Audny Anke<sup>5</sup>, Anna Antoni<sup>6</sup>, Gérard Audibert<sup>7</sup>, Philippe Azouvi<sup>8</sup>, Maria Luisa Azzolini<sup>9</sup>, Ronald Bartels<sup>10</sup>, Pál Barzó<sup>11</sup>, Romuald Beauvais<sup>12</sup>, Ronny Beer<sup>13</sup>, Bo-Michael Bellander<sup>14</sup>, Antonio Belli<sup>15</sup>, Habib Benali<sup>16</sup>, Maurizio Berardino<sup>17</sup>, Luigi Beretta<sup>9</sup>, Morten Blaabjerg<sup>18</sup>, Peter Bragge<sup>19</sup>, Alexandra Brazinova<sup>20</sup>, Vibeke Brinck<sup>21</sup>, Joanne Brooker<sup>22</sup>, Camilla Brorsson<sup>23</sup>, Andras Buki<sup>24</sup>, Monika Bullinger<sup>25</sup>, Manuel Cabeleira<sup>26</sup>, Alessio Caccioppola<sup>27</sup>, Emiliana Calappi<sup>27</sup>, Maria Rosa Calvi<sup>9</sup>, Peter Cameron<sup>28</sup>, Guillermo Carbayo Lozano<sup>29</sup>, Marco Carbonara<sup>27</sup>, Simona Cavallo<sup>17</sup>, Giorgio Chevallard<sup>30</sup>, Arturo Chieragato<sup>30</sup>, Giuseppe Citerio<sup>31, 32</sup>, Iris Ceyisakar<sup>33</sup>, Hans Clusmann<sup>34</sup>, Mark Coburn<sup>35</sup>, Jonathan Coles<sup>36</sup>, Jamie D. Cooper<sup>37</sup>, Marta Correia<sup>38</sup>, Amra Čović<sup>39</sup>, Nicola Curry<sup>40</sup>, Endre Czeiter<sup>24</sup>, Marek Czosnyka<sup>26</sup>, Claire Dahyot-Fizelier<sup>41</sup>, Paul Dark<sup>42</sup>, Helen Dawes<sup>43</sup>, Véronique DeKeyser<sup>44</sup>, Vincent Degos<sup>16</sup>, Francesco Della Corte<sup>45</sup>, Hugo den Boogert<sup>10</sup>, Bart Depreitere<sup>46</sup>, Đula Đilvesi<sup>47</sup>, Abhishek Dixit<sup>48</sup>, Emma Donoghue<sup>22</sup>, Jens Dreier<sup>49</sup>, Guy-Loup Dulière<sup>50</sup>, Ari Ercole<sup>48</sup>, Patrick Esser<sup>43</sup>, Erzsébet Ezer<sup>51</sup>, Martin Fabricius<sup>52</sup>, Valery L. Feigin<sup>53</sup>, Kelly Foks<sup>54</sup>, Shirin Frisvold<sup>55</sup>, Alex Furmanov<sup>56</sup>, Pablo Gagliardi<sup>57</sup>, Damien Galanaud<sup>16</sup>, Dashiell Gantner<sup>28</sup>, Guoyi Gao<sup>58</sup>, Pradeep George<sup>59</sup>, Alexandre Ghuysen<sup>60</sup>, Lelde Giga<sup>61</sup>, Ben Glocker<sup>62</sup>, Jagoš Golubovic<sup>47</sup>, Pedro A. Gomez<sup>63</sup>, Johannes Gratz<sup>64</sup>, Benjamin Gravesteijn<sup>33</sup>, Francesca Grossi<sup>45</sup>, Russell L. Gruen<sup>65</sup>, Deepak Gupta<sup>66</sup>, Juanita A. Haagsma<sup>33</sup>, Iain Haitsma<sup>67</sup>, Raimund Helbok<sup>13</sup>, Eirik Helseth<sup>68</sup>, Lindsay Horton<sup>69</sup>, Jilske Huijben<sup>33</sup>, Peter J. Hutchinson<sup>70</sup>, Bram Jacobs<sup>71</sup>, Stefan Jankowski<sup>72</sup>, Mike Jarrett<sup>21</sup>, Ji-yao Jiang<sup>58</sup>, Faye Johnson<sup>73</sup>, Kelly Jones<sup>53</sup>, Mladen Karan<sup>47</sup>, Angelos G. Kolias<sup>70</sup>, Erwin Kompanje<sup>74</sup>, Daniel Kondziella<sup>52</sup>, Evgenios Koraropoulos<sup>48</sup>, Lars-Owe Koskinen<sup>75</sup>, Noémi Kovács<sup>76</sup>, Ana Kowark<sup>35</sup>, Alfonso Lagares<sup>63</sup>, Linda Lanyon<sup>59</sup>, Steven Laureys<sup>77</sup>, Fiona Lecky<sup>78, 79</sup>, Didier Ledoux<sup>77</sup>, Rolf Lefering<sup>80</sup>, Valerie Legrand<sup>81</sup>, Aurelie Lejeune<sup>82</sup>, Leon Levi<sup>83</sup>, Roger Lightfoot<sup>84</sup>, Hester Lingsma<sup>33</sup>, Andrew I.R. Maas<sup>44</sup>, Ana M. Castaño-León<sup>63</sup>, Marc Maegle<sup>85</sup>, Marek Majdan<sup>20</sup>, Alex Manara<sup>86</sup>, Geoffrey Manley<sup>87</sup>, Costanza Martino<sup>88</sup>, Hugues Maréchal<sup>50</sup>, Julia Matern<sup>89</sup>, Catherine McMahon<sup>90</sup>, Béla Meleg<sup>91</sup>, David Menon<sup>48</sup>, Tomas Menovsky<sup>44</sup>, Ana Mikolic<sup>33</sup>, Benoit Misset<sup>77</sup>, Visakh Muraleedharan<sup>59</sup>, Lynnette Murray<sup>28</sup>, Ancuta Negru<sup>92</sup>, David Nelson<sup>1</sup>, Virginia Newcombe<sup>48</sup>, Daan Nieboer<sup>33</sup>, József Nyírádi<sup>2</sup>, Otesile Olubukola<sup>78</sup>, Matej Oresic<sup>93</sup>, Fabrizio Ortolano<sup>27</sup>, Aarno Palotie<sup>94, 95, 96</sup>, Paul M. Parizel<sup>97</sup>, Jean-François Payen<sup>98</sup>, Natascha Perera<sup>12</sup>, Vincent Perlbarg<sup>16</sup>, Paolo Persona<sup>99</sup>, Wilco Peul<sup>100</sup>, Anna Piippo-Karjalainen<sup>101</sup>, Matti Pirinen<sup>94</sup>, Horia Ples<sup>92</sup>, Suzanne Polinder<sup>33</sup>, Inigo Pomposo<sup>29</sup>, Jussi P. Posti<sup>102</sup>, Louis Puybasset<sup>103</sup>, Andreea Radoi<sup>104</sup>, Arminas Ragauskas<sup>105</sup>, Rahul Raj<sup>101</sup>, Malinka Rambadagalla<sup>106</sup>, Jonathan Rhodes<sup>107</sup>, Sylvia Richardson<sup>108</sup>, Sophie Richter<sup>48</sup>, Samuli Ripatti<sup>94</sup>, Saulius Rocka<sup>105</sup>, Cecilie Roe<sup>109</sup>, Olav Roise<sup>110, 111</sup>, Jonathan Rosand<sup>112</sup>, Jeffrey V. Rosenfeld<sup>113</sup>, Christina Rosenlund<sup>114</sup>, Guy Rosenthal<sup>56</sup>, Rolf Rossaint<sup>35</sup>, Sandra Rossi<sup>99</sup>, Daniel Rueckert<sup>62</sup>, Martin Rusnák<sup>115</sup>, Juan Sahuquillo<sup>104</sup>, Oliver Sakowitz<sup>89, 116</sup>, Renan Sanchez-Porras<sup>116</sup>, Janos Sandor<sup>117</sup>, Nadine Schäfer<sup>80</sup>, Silke Schmidt<sup>118</sup>, Herbert Schoechl<sup>119</sup>, Guus Schoonman<sup>120</sup>, Rico Frederik Schou<sup>121</sup>, Elisabeth Schwendenwein<sup>6</sup>, Charlie Sewalt<sup>33</sup>, Toril Skandsen<sup>122, 123</sup>, Peter Smielewski<sup>26</sup>, Abayomi Sorinola<sup>124</sup>, Emmanuel Stamatakis<sup>48</sup>, Simon Stanworth<sup>40</sup>, Robert Stevens<sup>125</sup>, William Stewart<sup>126</sup>, Ewout W. Steyerberg<sup>33, 127</sup>, Nino Stocchetti<sup>128</sup>, Nina Sundström<sup>129</sup>, Anneliese Synnot<sup>22, 130</sup>, Riikka Takala<sup>131</sup>, Viktória Tamás<sup>124</sup>, Tomas Tamosiutis<sup>132</sup>, Mark Steven Taylor<sup>20</sup>, Braden Te Ao<sup>53</sup>, Olli Tenovu<sup>102</sup>, Alice Theadom<sup>53</sup>, Matt Thomas<sup>86</sup>, Dick Tibboel<sup>133</sup>, Marjolien Timmers<sup>74</sup>, Christos Tolia<sup>134</sup>, Tony Trapani<sup>28</sup>, Cristina Maria Tudora<sup>92</sup>, Peter Vajkoczy<sup>135</sup>, Shirley Vallance<sup>28</sup>, Egils Valeinis<sup>61</sup>, Zoltán Vámos<sup>51</sup>, Mathieu van der Jagt<sup>136</sup>, Gregory Van der Steen<sup>44</sup>, Joukje van der Naalt<sup>71</sup>, Jeroen T.J.M. van Dijk<sup>100</sup>, Thomas A. van Essen<sup>100</sup>, Wim Van Hecke<sup>137</sup>, Caroline van Heugten<sup>138</sup>, Dominique Van Praag<sup>139</sup>, Thijs Vande Vyvere<sup>137</sup>, Roel P. J. van Wijk<sup>100</sup>, Alessia Vargiolu<sup>32</sup>, Emmanuel Vega<sup>82</sup>, Kimberley Velt<sup>33</sup>, Jan Verheyden<sup>137</sup>, Paul M. Vespa<sup>140</sup>, Anne Vik<sup>122, 141</sup>, Rimantas Vilcinis<sup>132</sup>, Victor Volovici<sup>67</sup>, Nicole von Steinbüchel<sup>39</sup>, Daphne Voormolen<sup>33</sup>, Petar Vulekovic<sup>47</sup>, Kevin K.W. Wang<sup>142</sup>, Eveline Wiegers<sup>33</sup>, Guy Williams<sup>48</sup>, Lindsay Wilson<sup>69</sup>, Stefan Winzeck<sup>48</sup>, Stefan Wolf<sup>143</sup>, Zhihui Yang<sup>142</sup>, Peter Ylén<sup>144</sup>, Alexander Younsi<sup>89</sup>, Frederick A. Zeiler<sup>48, 145</sup>, Veronika Zelinkova<sup>20</sup>, Agate Ziverte<sup>61</sup>, Tommaso Zoerle<sup>27</sup>

<sup>1</sup> Department of Physiology and Pharmacology, Section of Perioperative Medicine and Intensive Care, Karolinska Institutet, Stockholm, Sweden

<sup>2</sup> János Szentágothai Research Centre, University of Pécs, Pécs, Hungary

<sup>3</sup> Division of Surgery and Clinical Neuroscience, Department of Physical Medicine and Rehabilitation, Oslo University Hospital and University of Oslo, Oslo, Norway

<sup>4</sup> Department of Neurosurgery, University Hospital Northern Norway, Tromsø, Norway

<sup>5</sup> Department of Physical Medicine and Rehabilitation, University Hospital Northern Norway, Tromsø, Norway

<sup>6</sup> Trauma Surgery, Medical University Vienna, Vienna, Austria

<sup>7</sup> Department of Anesthesiology & Intensive Care, University Hospital Nancy, Nancy, France

<sup>8</sup> Raymond Poincaré hospital, Assistance Publique – Hôpitaux de Paris, Paris, France

<sup>9</sup> Department of Anesthesiology & Intensive Care, S Raffaele University Hospital, Milan, Italy

<sup>10</sup> Department of Neurosurgery, Radboud University Medical Center, Nijmegen, The Netherlands

<sup>11</sup> Department of Neurosurgery, University of Szeged, Szeged, Hungary

<sup>12</sup> International Projects Management, ARTTIC, München, Germany

<sup>13</sup> Department of Neurology, Neurological Intensive Care Unit, Medical University of Innsbruck, Innsbruck, Austria

<sup>14</sup> Department of Neurosurgery & Anesthesia & intensive care medicine, Karolinska University Hospital, Stockholm, Sweden

<sup>15</sup> NIHR Surgical Reconstruction and Microbiology Research Centre, Birmingham, UK

<sup>16</sup> Anesthésie-Réanimation, Assistance Publique – Hôpitaux de Paris, Paris, France

<sup>17</sup> Department of Anesthesia & ICU, AOU Città della Salute e della Scienza di Torino - Orthopedic and Trauma Center, Torino, Italy

<sup>18</sup> Department of Neurology, Odense University Hospital, Odense, Denmark

<sup>19</sup> BehaviourWorks Australia, Monash Sustainability Institute, Monash University, Victoria, Australia

<sup>20</sup> Department of Public Health, Faculty of Health Sciences and Social Work, Trnava University, Trnava, Slovakia

<sup>21</sup> Quesgen Systems Inc., Burlingame, California, USA

<sup>22</sup> Australian & New Zealand Intensive Care Research Centre, Department of Epidemiology and Preventive Medicine, School of Public Health and Preventive Medicine, Monash University, Melbourne, Australia

- <sup>23</sup> Department of Surgery and Perioperative Science, Umeå University, Umeå, Sweden
- <sup>24</sup> Department of Neurosurgery, Medical School, University of Pécs, Hungary and Neurotrauma Research Group, János Szentágothai Research Centre, University of Pécs, Hungary
- <sup>25</sup> Department of Medical Psychology, Universitätsklinikum Hamburg-Eppendorf, Hamburg, Germany
- <sup>26</sup> Brain Physics Lab, Division of Neurosurgery, Dept of Clinical Neurosciences, University of Cambridge, Addenbrooke's Hospital, Cambridge, UK
- <sup>27</sup> Neuro ICU, Fondazione IRCCS Cà Granda Ospedale Maggiore Policlinico, Milan, Italy
- <sup>28</sup> ANZIC Research Centre, Monash University, Department of Epidemiology and Preventive Medicine, Melbourne, Victoria, Australia
- <sup>29</sup> Department of Neurosurgery, Hospital of Cruces, Bilbao, Spain
- <sup>30</sup> NeuroIntensive Care, Niguarda Hospital, Milan, Italy
- <sup>31</sup> School of Medicine and Surgery, Università Milano Bicocca, Milano, Italy
- <sup>32</sup> NeuroIntensive Care, ASST di Monza, Monza, Italy
- <sup>33</sup> Department of Public Health, Erasmus Medical Center-University Medical Center, Rotterdam, The Netherlands
- <sup>34</sup> Department of Neurosurgery, Medical Faculty RWTH Aachen University, Aachen, Germany
- <sup>35</sup> Department of Anaesthesiology, University Hospital of Aachen, Aachen, Germany
- <sup>36</sup> Department of Anesthesia & Neurointensive Care, Cambridge University Hospital NHS Foundation Trust, Cambridge, UK
- <sup>37</sup> School of Public Health & PM, Monash University and The Alfred Hospital, Melbourne, Victoria, Australia
- <sup>38</sup> Radiology/MRI department, MRC Cognition and Brain Sciences Unit, Cambridge, UK
- <sup>39</sup> Institute of Medical Psychology and Medical Sociology, Universitätsmedizin Göttingen, Göttingen, Germany
- <sup>40</sup> Oxford University Hospitals NHS Trust, Oxford, UK
- <sup>41</sup> Intensive Care Unit, CHU Poitiers, Poitiers, France
- <sup>42</sup> University of Manchester NIHR Biomedical Research Centre, Critical Care Directorate, Salford Royal Hospital NHS Foundation Trust, Salford, UK
- <sup>43</sup> Movement Science Group, Faculty of Health and Life Sciences, Oxford Brookes University, Oxford, UK
- <sup>44</sup> Department of Neurosurgery, Antwerp University Hospital and University of Antwerp, Edegem, Belgium
- <sup>45</sup> Department of Anesthesia & Intensive Care, Maggiore Della Carità Hospital, Novara, Italy
- <sup>46</sup> Department of Neurosurgery, University Hospitals Leuven, Leuven, Belgium
- <sup>47</sup> Department of Neurosurgery, Clinical centre of Vojvodina, Faculty of Medicine, University of Novi Sad, Novi Sad, Serbia
- <sup>48</sup> Division of Anaesthesia, University of Cambridge, Addenbrooke's Hospital, Cambridge, UK
- <sup>49</sup> Center for Stroke Research Berlin, Charité – Universitätsmedizin Berlin, corporate member of Freie Universität Berlin, Humboldt-Universität zu Berlin, and Berlin Institute of Health, Berlin, Germany
- <sup>50</sup> Intensive Care Unit, CHR Citadelle, Liège, Belgium
- <sup>51</sup> Department of Anaesthesiology and Intensive Therapy, University of Pécs, Pécs, Hungary
- <sup>52</sup> Departments of Neurology, Clinical Neurophysiology and Neuroanesthesiology, Region Hovedstaden Rigshospitalet, Copenhagen, Denmark
- <sup>53</sup> National Institute for Stroke and Applied Neurosciences, Faculty of Health and Environmental Studies, Auckland University of Technology, Auckland, New Zealand
- <sup>54</sup> Department of Neurology, Erasmus MC, Rotterdam, the Netherlands
- <sup>55</sup> Department of Anesthesiology and Intensive care, University Hospital Northern Norway, Tromsø, Norway
- <sup>56</sup> Department of Neurosurgery, Hadassah-hebrew University Medical center, Jerusalem, Israel
- <sup>57</sup> Fundación Instituto Valenciano de Neurorrehabilitación (FIVAN), Valencia, Spain
- <sup>58</sup> Department of Neurosurgery, Shanghai Renji hospital, Shanghai Jiaotong University/school of medicine, Shanghai, China
- <sup>59</sup> Karolinska Institutet, INCF International Neuroinformatics Coordinating Facility, Stockholm, Sweden
- <sup>60</sup> Emergency Department, CHU, Liège, Belgium
- <sup>61</sup> Neurosurgery clinic, Pauls Stradins Clinical University Hospital, Riga, Latvia
- <sup>62</sup> Department of Computing, Imperial College London, London, UK
- <sup>63</sup> Department of Neurosurgery, Hospital Universitario 12 de Octubre, Madrid, Spain
- <sup>64</sup> Department of Anesthesia, Critical Care and Pain Medicine, Medical University of Vienna, Austria
- <sup>65</sup> College of Health and Medicine, Australian National University, Canberra, Australia
- <sup>66</sup> Department of Neurosurgery, Neurosciences Centre & JPN Apex trauma centre, All India Institute of Medical Sciences, New Delhi-110029, India
- <sup>67</sup> Department of Neurosurgery, Erasmus MC, Rotterdam, the Netherlands
- <sup>68</sup> Department of Neurosurgery, Oslo University Hospital, Oslo, Norway
- <sup>69</sup> Division of Psychology, University of Stirling, Stirling, UK
- <sup>70</sup> Division of Neurosurgery, Department of Clinical Neurosciences, Addenbrooke's Hospital & University of Cambridge, Cambridge, UK
- <sup>71</sup> Department of Neurology, University of Groningen, University Medical Center Groningen, Groningen, Netherlands
- <sup>72</sup> Neurointensive Care, Sheffield Teaching Hospitals NHS Foundation Trust, Sheffield, UK
- <sup>73</sup> Salford Royal Hospital NHS Foundation Trust Acute Research Delivery Team, Salford, UK
- <sup>74</sup> Department of Intensive Care and Department of Ethics and Philosophy of Medicine, Erasmus Medical Center, Rotterdam, The Netherlands
- <sup>75</sup> Department of Clinical Neuroscience, Neurosurgery, Umeå University, Umeå, Sweden
- <sup>76</sup> Hungarian Brain Research Program - Grant No. KTIA\_13\_NAP-A-II/8, University of Pécs, Pécs, Hungary
- <sup>77</sup> Cyclotron Research Center, University of Liège, Liège, Belgium

- <sup>78</sup> Centre for Urgent and Emergency Care Research (CURE), Health Services Research Section, School of Health and Related Research (SchHARR), University of Sheffield, Sheffield, UK
- <sup>79</sup> Emergency Department, Salford Royal Hospital, Salford UK
- <sup>80</sup> Institute of Research in Operative Medicine (IFOM), Witten/Herdecke University, Cologne, Germany
- <sup>81</sup> VP Global Project Management CNS, ICON, Paris, France
- <sup>82</sup> Department of Anesthesiology-Intensive Care, Lille University Hospital, Lille, France
- <sup>83</sup> Department of Neurosurgery, Rambam Medical Center, Haifa, Israel
- <sup>84</sup> Department of Anesthesiology & Intensive Care, University Hospitals Southampton NHS Trust, Southampton, UK
- <sup>85</sup> Cologne-Merheim Medical Center (CMMC), Department of Traumatology, Orthopedic Surgery and Sportmedicine, Witten/Herdecke University, Cologne, Germany
- <sup>86</sup> Intensive Care Unit, Southmead Hospital, Bristol, Bristol, UK
- <sup>87</sup> Department of Neurological Surgery, University of California, San Francisco, California, USA
- <sup>88</sup> Department of Anesthesia & Intensive Care, M. Bufalini Hospital, Cesena, Italy
- <sup>89</sup> Department of Neurosurgery, University Hospital Heidelberg, Heidelberg, Germany
- <sup>90</sup> Department of Neurosurgery, The Walton centre NHS Foundation Trust, Liverpool, UK
- <sup>91</sup> Department of Medical Genetics, University of Pécs, Pécs, Hungary
- <sup>92</sup> Department of Neurosurgery, Emergency County Hospital Timisoara, Timisoara, Romania
- <sup>93</sup> School of Medical Sciences, Örebro University, Örebro, Sweden
- <sup>94</sup> Institute for Molecular Medicine Finland, University of Helsinki, Helsinki, Finland
- <sup>95</sup> Analytic and Translational Genetics Unit, Department of Medicine; Psychiatric & Neurodevelopmental Genetics Unit, Department of Psychiatry; Department of Neurology, Massachusetts General Hospital, Boston, MA, USA
- <sup>96</sup> Program in Medical and Population Genetics; The Stanley Center for Psychiatric Research, The Broad Institute of MIT and Harvard, Cambridge, MA, USA
- <sup>97</sup> Department of Radiology, University of Antwerp, Edegem, Belgium
- <sup>98</sup> Department of Anesthesiology & Intensive Care, University Hospital of Grenoble, Grenoble, France
- <sup>99</sup> Department of Anesthesia & Intensive Care, Azienda Ospedaliera Università di Padova, Padova, Italy
- <sup>100</sup> Dept. of Neurosurgery, Leiden University Medical Center, Leiden, The Netherlands and Dept. of Neurosurgery, Medical Center Haaglanden, The Hague, The Netherlands
- <sup>101</sup> Department of Neurosurgery, Helsinki University Central Hospital
- <sup>102</sup> Division of Clinical Neurosciences, Department of Neurosurgery and Turku Brain Injury Centre, Turku University Hospital and University of Turku, Turku, Finland
- <sup>103</sup> Department of Anesthesiology and Critical Care, Pitié -Salpêtrière Teaching Hospital, Assistance Publique, Hôpitaux de Paris and University Pierre et Marie Curie, Paris, France
- <sup>104</sup> Neurotraumatology and Neurosurgery Research Unit (UNINN), Vall d'Hebron Research Institute, Barcelona, Spain
- <sup>105</sup> Department of Neurosurgery, Kaunas University of technology and Vilnius University, Vilnius, Lithuania
- <sup>106</sup> Department of Neurosurgery, Rezekne Hospital, Latvia
- <sup>107</sup> Department of Anesthesia, Critical Care & Pain Medicine NHS Lothian & University of Edinburgh, Edinburgh, UK
- <sup>108</sup> Director, MRC Biostatistics Unit, Cambridge Institute of Public Health, Cambridge, UK
- <sup>109</sup> Department of Physical Medicine and Rehabilitation, Oslo University Hospital/University of Oslo, Oslo, Norway
- <sup>110</sup> Division of Orthopedics, Oslo University Hospital, Oslo, Norway
- <sup>111</sup> Institute of Clinical Medicine, Faculty of Medicine, University of Oslo, Oslo, Norway
- <sup>112</sup> Broad Institute, Cambridge MA Harvard Medical School, Boston MA, Massachusetts General Hospital, Boston MA, USA
- <sup>113</sup> National Trauma Research Institute, The Alfred Hospital, Monash University, Melbourne, Victoria, Australia
- <sup>114</sup> Department of Neurosurgery, Odense University Hospital, Odense, Denmark
- <sup>115</sup> International Neurotrauma Research Organization, Vienna, Austria
- <sup>116</sup> Klinik für Neurochirurgie, Klinikum Ludwigsburg, Ludwigsburg, Germany
- <sup>117</sup> Division of Biostatistics and Epidemiology, Department of Preventive Medicine, University of Debrecen, Debrecen, Hungary
- <sup>118</sup> Department Health and Prevention, University Greifswald, Greifswald, Germany
- <sup>119</sup> Department of Anesthesiology and Intensive Care, AUVA Trauma Hospital, Salzburg, Austria
- <sup>120</sup> Department of Neurology, Elisabeth-TweeSteden Ziekenhuis, Tilburg, the Netherlands
- <sup>121</sup> Department of Neuroanesthesia and Neurointensive Care, Odense University Hospital, Odense, Denmark
- <sup>122</sup> Department of Neuromedicine and Movement Science, Norwegian University of Science and Technology, NTNU, Trondheim, Norway
- <sup>123</sup> Department of Physical Medicine and Rehabilitation, St. Olavs Hospital, Trondheim University Hospital, Trondheim, Norway
- <sup>124</sup> Department of Neurosurgery, University of Pécs, Pécs, Hungary
- <sup>125</sup> Division of Neuroscience Critical Care, John Hopkins University School of Medicine, Baltimore, USA
- <sup>126</sup> Department of Neuropathology, Queen Elizabeth University Hospital and University of Glasgow, Glasgow, UK
- <sup>127</sup> Dept. of Department of Biomedical Data Sciences, Leiden University Medical Center, Leiden, The Netherlands
- <sup>128</sup> Department of Pathophysiology and Transplantation, Milan University, and Neuroscience ICU, Fondazione IRCCS Cà Granda Ospedale Maggiore Policlinico, Milano, Italy
- <sup>129</sup> Department of Radiation Sciences, Biomedical Engineering, Umeå University, Umeå, Sweden
- <sup>130</sup> Cochrane Consumers and Communication Review Group, Centre for Health Communication and Participation, School of Psychology and Public Health, La Trobe University, Melbourne, Australia
- <sup>131</sup> Perioperative Services, Intensive Care Medicine and Pain Management, Turku University Hospital and University of Turku, Turku, Finland

- <sup>132</sup> Department of Neurosurgery, Kaunas University of Health Sciences, Kaunas, Lithuania
- <sup>133</sup> Intensive Care and Department of Pediatric Surgery, Erasmus Medical Center, Sophia Children's Hospital, Rotterdam, The Netherlands
- <sup>134</sup> Department of Neurosurgery, Kings college London, London, UK
- <sup>135</sup> Neurologie, Neurochirurgie und Psychiatrie, Charité – Universitätsmedizin Berlin, Berlin, Germany
- <sup>136</sup> Department of Intensive Care Adults, Erasmus MC– University Medical Center Rotterdam, Rotterdam, the Netherlands
- <sup>137</sup> icoMetrix NV, Leuven, Belgium
- <sup>138</sup> Movement Science Group, Faculty of Health and Life Sciences, Oxford Brookes University, Oxford, UK
- <sup>139</sup> Psychology Department, Antwerp University Hospital, Edegem, Belgium
- <sup>140</sup> Director of Neurocritical Care, University of California, Los Angeles, USA
- <sup>141</sup> Department of Neurosurgery, St.Olavs Hospital, Trondheim University Hospital, Trondheim, Norway
- <sup>142</sup> Department of Emergency Medicine, University of Florida, Gainesville, Florida, USA
- <sup>143</sup> Department of Neurosurgery, Charité – Universitätsmedizin Berlin, corporate member of Freie Universität Berlin, Humboldt-Universität zu Berlin, and Berlin Institute of Health, Berlin, Germany
- <sup>144</sup> VTT Technical Research Centre, Tampere, Finland
- <sup>145</sup> Section of Neurosurgery, Department of Surgery, Rady Faculty of Health Sciences, University of Manitoba, Winnipeg, MB, Canada
