# Supplementary material for: Influence of Sociodemographic, Premorbid, and Injury-Related Factors on Post-Concussion Symptoms after Traumatic Brain Injury
Source: MDPI journal article supplement (doi:10.3390/jcm9061931), 2020-06-19
Supplement: s1 [file s1]

**Table S1.** Estimates, odds ratios and rate ratios of the ZINB model. The zero model predicts the probability of *non-occurrence* of PCS; the count model predicts the average number of PCS for the mTBI subsample.

| No.   | Predictors         | Levels   reference group                       | Zero model |      |       |      |                  |                 | Count model |      |       |      |                  |                 |
|-------|--------------------|------------------------------------------------|------------|------|-------|------|------------------|-----------------|-------------|------|-------|------|------------------|-----------------|
|       |                    |                                                | Est.       | S.E. | z     | OR   | CI <sub>95</sub> | p               | Est.        | S.E. | z     | RR   | CI <sub>95</sub> | p               |
|       |                    | Intercept                                      | -3.80      | 0.94 | -4.06 | 0.02 | [0.001, 0.14]    | <b>&lt;.001</b> | 1.96        | 0.25 | 7.91  | 7.12 | [4.38, 11.58]    | <b>&lt;.001</b> |
| (1)   | Age                | in years                                       | 0.02       | 0.01 | 1.58  | 1.02 | [1.00, 1.04]     | 0.115           | 0.00        | 0.00 | -1.05 | 1.00 | [0.99, 1.00]     | 0.296           |
| (2)   | Sex                | male   female                                  | 1.03       | 0.56 | 1.85  | 2.81 | [0.94, 8.44]     | 0.065           | -0.50       | 0.21 | -2.41 | 0.61 | [0.40, 0.91]     | <b>0.016</b>    |
|       |                    | part time   full-time                          | 0.04       | 0.27 | 0.13  | 1.04 | [0.61, 1.78]     | 0.894           | -0.04       | 0.10 | -0.39 | 0.96 | [0.8, 1.16]      | 0.697           |
| (4)   | Employment         | in training   full-time                        | 1.13       | 0.36 | 3.12  | 3.08 | [1.52, 6.26]     | <b>0.002</b>    | -0.12       | 0.15 | -0.83 | 0.88 | [0.66, 1.19]     | 0.409           |
|       |                    | unemployed   full-time                         | -0.03      | 0.40 | -0.07 | 0.97 | [0.45, 2.11]     | 0.943           | 0.19        | 0.13 | 1.54  | 1.21 | [0.95, 1.55]     | 0.123           |
|       |                    | retired   full-time                            | 0.25       | 0.31 | 0.80  | 1.28 | [0.70, 2.34]     | 0.422           | -0.18       | 0.11 | -1.60 | 0.84 | [0.68, 1.04]     | 0.111           |
| (5)   | Education          | none/primary school   college/university       | -0.50      | 0.31 | -1.62 | 0.61 | [0.33, 1.11]     | 0.106           | -0.03       | 0.11 | -0.28 | 0.97 | [0.78, 1.21]     | 0.778           |
|       |                    | secondary/high school   college/university     | -0.37      | 0.23 | -1.60 | 0.69 | [0.44, 1.09]     | 0.109           | 0.03        | 0.08 | 0.39  | 1.03 | [0.88, 1.21]     | 0.700           |
|       |                    | post-high school training   college/university | -0.29      | 0.25 | -1.17 | 0.75 | [0.46, 1.22]     | 0.243           | 0.24        | 0.09 | 2.56  | 1.27 | [1.06, 1.52]     | <b>0.011</b>    |
| (7)   | Total ISS          | total injury severity score                    | -0.04      | 0.01 | -3.29 | 0.96 | [0.94, 0.98]     | <b>0.001</b>    | 0.01        | 0.00 | 2.39  | 1.01 | [1.0, 1.01]      | <b>0.017</b>    |
| (8)   | TBI severity       | uncomplicated mild   complicated mild          | 1.00       | 0.21 | 4.72  | 2.73 | [1.80, 4.14]     | <b>&lt;.001</b> | 0.04        | 0.07 | 0.58  | 1.04 | [0.91, 1.2]      | 0.560           |
|       |                    | none   emotional/addiction                     | 1.83       | 0.67 | 2.75  | 6.26 | [1.7, 23.11]     | <b>0.006</b>    | -0.15       | 0.12 | -1.27 | 0.86 | [0.68, 1.09]     | 0.205           |
|       |                    | physical   emotional/addiction                 | 0.49       | 0.82 | 0.60  | 1.64 | [0.33, 8.19]     | 0.548           | -0.25       | 0.16 | -1.51 | 0.78 | [0.56, 1.08]     | 0.131           |
| (10)  | Premorbid problems | concussion   emotional/addiction               | 1.36       | 0.73 | 1.85  | 3.90 | [0.93, 16.46]    | 0.064           | -0.22       | 0.17 | -1.30 | 0.81 | [0.58, 1.12]     | 0.195           |
|       |                    | migraine   emotional/addiction                 | 1.79       | 0.89 | 2.02  | 6.02 | [1.05, 34.34]    | <b>0.043</b>    | 0.14        | 0.26 | 0.53  | 1.15 | [0.69, 1.92]     | 0.598           |
|       |                    | neurological   emotional/addiction             | 1.63       | 0.77 | 2.12  | 5.10 | [1.13, 23.04]    | <b>0.034</b>    | 0.04        | 0.20 | 0.22  | 1.05 | [0.71, 1.55]     | 0.828           |
|       |                    | mixed   emotional/addiction                    | 0.64       | 0.73 | 0.88  | 1.89 | [0.45, 7.90]     | 0.382           | 0.06        | 0.14 | 0.42  | 1.06 | [0.8, 1.4]       | 0.676           |
| (1:2) | Age : sex          | age : male   age : female                      | -0.01      | 0.01 | -1.09 | 0.99 | [0.97, 1.01]     | 0.275           | 0.01        | 0.00 | 1.52  | 1.01 | [1, 1.01]        | 0.128           |

*Note.* Numbers in parenthesis correspond to the numbers in Table 1 in the main manuscript and are used for reference in the text; ER = emergency department, ADM = admission, ICU = intensive care unit, TBI = traumatic brain injury, age : sex = interaction between the age and sex groups. The zero model predicts the *non-occurrence* of PCS; the count model predicts the average number of PCS. Est. = estimate, model coefficient, S.E. = standard error, z = z-value, OR = Odds ratio, CI<sub>95</sub> = 95% confidence interval [lower, upper]; RR = rate ratio; Bold *p*-values are significant at  $\alpha = .05$ .

**Table S2.** Estimates and rate ratios of negative binomial model for intensity of PCS evaluated with the RPQ total score, RPQ-3, and RPQ-13 score for the mTBI subsample.

| No.    | Predictors         | Levels   reference group                            | RPQ total score |      |       |       |                  |              | RPQ-3 score |      |       |      |                  |              | RPQ-13 score |      |       |       |                  |              |
|--------|--------------------|-----------------------------------------------------|-----------------|------|-------|-------|------------------|--------------|-------------|------|-------|------|------------------|--------------|--------------|------|-------|-------|------------------|--------------|
|        |                    |                                                     | Est.            | S.E. | z     | RR    | CI <sub>95</sub> | p            | Est.        | S.E. | z     | RR   | CI <sub>95</sub> | p            | Est.         | S.E. | z     | RR    | CI <sub>95</sub> | p            |
|        |                    | Intercept                                           | 3.25            | 0.26 | 12.47 | 25.90 | [15.18, 44.73]   | <.001        | 2.12        | 0.27 | 7.72  | 8.31 | [4.75, 14.69]    | <.001        | 2.94         | 0.27 | 10.82 | 19.00 | [10.88, 33.62]   | <.001        |
| (1)    | Age                | in years                                            | -0.01           | 0.00 | -1.93 | 0.99  | [0.98, 1.00]     | 0.053        | -0.01       | 0.00 | -3.38 | 0.99 | [0.98, 0.99]     | <b>0.001</b> | -0.01        | 0.00 | -1.41 | 0.99  | [0.99, 1.00]     | 0.159        |
| (2)    | Sex                | male   female                                       | -0.61           | 0.22 | -2.80 | 0.54  | [0.35, 0.83]     | <b>0.005</b> | -0.90       | 0.24 | -3.79 | 0.41 | [0.26, 0.65]     | <.001        | -0.53        | 0.23 | -2.33 | 0.59  | [0.37, 0.92]     | <b>0.020</b> |
| (4)    | Employment         | part time   full-time                               | -0.04           | 0.11 | -0.34 | 0.96  | [0.78, 1.20]     | 0.736        | -0.17       | 0.12 | -1.38 | 0.85 | [0.67, 1.08]     | 0.168        | -0.01        | 0.11 | -0.10 | 0.99  | [0.80, 1.24]     | 0.924        |
|        |                    | in training   full-time                             | -0.41           | 0.15 | -2.76 | 0.66  | [0.50, 0.89]     | <b>0.006</b> | -0.42       | 0.17 | -2.51 | 0.66 | [0.48, 0.92]     | <b>0.012</b> | -0.41        | 0.15 | -2.67 | 0.66  | [0.49, 0.90]     | <b>0.008</b> |
|        |                    | unemployed   full-time                              | 0.17            | 0.14 | 1.15  | 1.18  | [0.89, 1.58]     | 0.250        | 0.14        | 0.16 | 0.88  | 1.15 | [0.85, 1.57]     | 0.377        | 0.17         | 0.15 | 1.16  | 1.19  | [0.89, 1.61]     | 0.247        |
|        |                    | retired   full-time                                 | -0.18           | 0.12 | -1.47 | 0.84  | [0.66, 1.06]     | 0.141        | -0.11       | 0.14 | -0.80 | 0.90 | [0.69, 1.17]     | 0.422        | -0.19        | 0.12 | -1.49 | 0.83  | [0.65, 1.06]     | 0.138        |
| (5)    | Education          | none/primary school   college/university            | 0.11            | 0.12 | 0.91  | 1.11  | [0.88, 1.40]     | 0.362        | 0.28        | 0.13 | 2.16  | 1.33 | [1.02, 1.73]     | <b>0.031</b> | 0.07         | 0.12 | 0.56  | 1.07  | [0.84, 1.36]     | 0.577        |
|        |                    | at least secondary/high school   college/university | 0.14            | 0.09 | 1.59  | 1.15  | [0.97, 1.37]     | 0.112        | 0.27        | 0.10 | 2.65  | 1.30 | [1.07, 1.59]     | <b>0.008</b> | 0.12         | 0.09 | 1.29  | 1.13  | [0.94, 1.35]     | 0.197        |
|        |                    | post-high school training   college/university      | 0.26            | 0.10 | 2.61  | 1.30  | [1.06, 1.58]     | <b>0.009</b> | 0.14        | 0.11 | 1.20  | 1.15 | [0.92, 1.44]     | 0.229        | 0.28         | 0.10 | 2.72  | 1.33  | [1.08, 1.63]     | <b>0.007</b> |
| (7)    | ISS                | total injury severity score                         | 0.01            | 0.00 | 2.97  | 1.01  | [1.00, 1.02]     | <b>0.003</b> | -           | -    | -     | -    | -                | -            | 0.01         | 0.00 | 3.12  | 1.01  | [1.00, 1.02]     | <b>0.002</b> |
| (8)    | TBI severity       | uncomplicated mild   complicated mild               | -0.14           | 0.08 | -1.85 | 0.87  | [0.75, 1.01]     | 0.065        | -0.22       | 0.08 | -2.71 | 0.81 | [0.69, 0.94]     | <b>0.007</b> | -0.13        | 0.08 | -1.65 | 0.88  | [0.75, 1.03]     | 0.100        |
| (9)    | LOC                | no   yes                                            | 0.15            | 0.12 | 1.25  | 1.16  | [0.92, 1.47]     | 0.211        | -           | -    | -     | -    | -                | -            | 0.14         | 0.12 | 1.14  | 1.15  | [0.90, 1.48]     | 0.254        |
| (10)   | Premorbid problems | none   emotional/addiction                          | -0.43           | 0.15 | -2.91 | 0.65  | [0.48, 0.86]     | <b>0.004</b> | -0.48       | 0.16 | -3.02 | 0.62 | [0.45, 0.84]     | <b>0.003</b> | -0.42        | 0.15 | -2.72 | 0.66  | [0.48, 0.88]     | <b>0.007</b> |
|        |                    | physical   emotional/addiction                      | -0.24           | 0.20 | -1.23 | 0.79  | [0.53, 1.15]     | 0.219        | -0.39       | 0.22 | -1.80 | 0.68 | [0.44, 1.03]     | 0.072        | -0.21        | 0.20 | -1.05 | 0.81  | [0.54, 1.20]     | 0.296        |
|        |                    | concussion   emotional/addiction                    | -0.37           | 0.19 | -1.93 | 0.69  | [0.47, 1.00]     | 0.053        | -0.42       | 0.21 | -1.99 | 0.66 | [0.43, 0.99]     | <b>0.047</b> | -0.36        | 0.20 | -1.79 | 0.70  | [0.47, 1.03]     | 0.074        |
|        |                    | migraine   emotional/addiction                      | -0.11           | 0.30 | -0.37 | 0.89  | [0.51, 1.66]     | 0.708        | -0.01       | 0.32 | -0.05 | 0.99 | [0.54, 1.88]     | 0.963        | -0.14        | 0.31 | -0.44 | 0.87  | [0.48, 1.66]     | 0.658        |
|        |                    | neurological   emotional/addiction                  | -0.23           | 0.23 | -0.98 | 0.80  | [0.51, 1.26]     | 0.326        | -0.15       | 0.25 | -0.61 | 0.86 | [0.53, 1.41]     | 0.542        | -0.23        | 0.24 | -0.98 | 0.79  | [0.50, 1.27]     | 0.329        |
|        |                    | mixed   emotional/addiction                         | -0.01           | 0.18 | -0.07 | 0.99  | [0.69, 1.39]     | 0.947        | -0.18       | 0.19 | -0.97 | 0.83 | [0.57, 1.21]     | 0.334        | 0.02         | 0.18 | 0.09  | 1.02  | [0.70, 1.45]     | 0.927        |
| (1:2)  | Age : sex          | age : male   age : female                           | 0.01            | 0.00 | 2.07  | 1.01  | [1.00, 1.02]     | <b>0.038</b> | 0.01        | 0.00 | 2.15  | 1.01 | [1.00, 1.02]     | <b>0.031</b> | 0.01         | 0.00 | 1.76  | 1.01  | [1.00, 1.02]     | 0.078        |
| (2:10) | Sex : LOC          | male : LOC   female : LOC                           | -0.23           | 0.15 | -1.52 | 0.80  | [0.59, 1.07]     | 0.129        | -           | -    | -     | -    | -                | -            | -0.24        | 0.16 | -1.55 | 0.79  | [0.58, 1.07]     | 0.121        |

*Note.* Numbers in parenthesis correspond to the numbers in Table 1 and are used for reference in the text; ER = emergency department, ADM = admission, ICU = intensive care unit, TBI = traumatic brain injury, LOC = loss of consciousness, age : sex = interaction between the age and sex groups. The zero model predicts the *non-occurrence* of PCS; the count model predicts the average number of PCS. Est. = estimate, model coefficient, S.E. = standard error, z = z-value, OR = Odds ratio, CI<sub>95</sub> = 95% confidence interval [lower, upper]; RR = rate ratio; **bold** p-values are significant at  $\alpha = .05$ .
